# Supplementary material for: Using low cost open-face passive samplers to sample PM concentration and elemental composition in childcare facilities
Source: Royal Society of Chemistry journal article supplement (doi:10.1039/d0em00075b), 2020-01-01
Supplement: d0em00075b1.pdf [file d0em00075b1.pdf]

1 Figure S1. Typical images of long fibers in samples with wall-to-wall carpet floor

### fiber-cc-15-3(1)

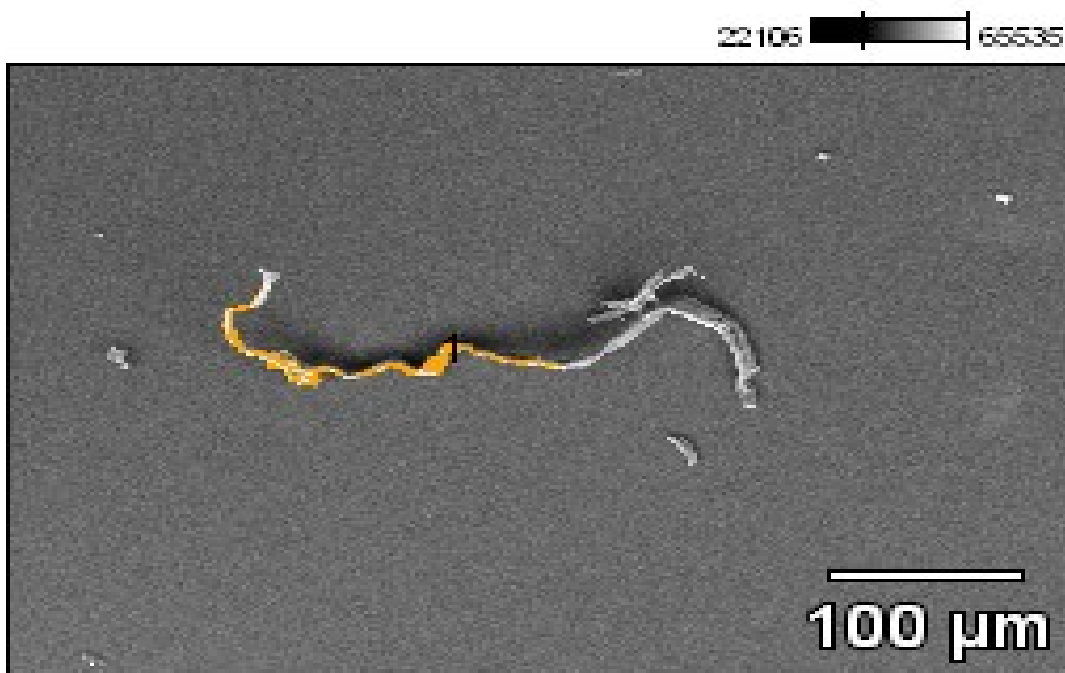

2

3

A. ESEM image of sampled long fiber

Full scale counts: 1379

fiber-cc-15-3(1)\_pt1

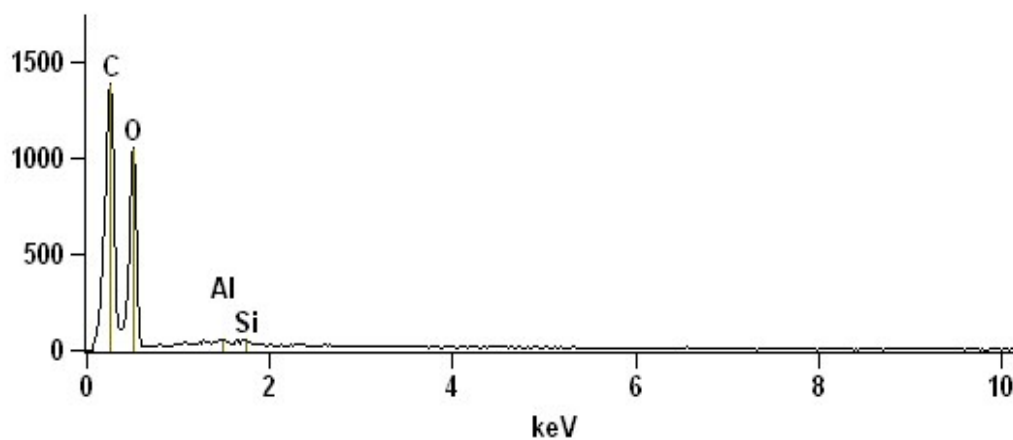

4

5

6

7

8

B. EDS spectrum for a large long fiber
